# Supplementary material for: ‘As long as I have a restroom somewhere […], I am fine’: a qualitative study on the perspectives of peri- and postmenopausal women on the impact of the urinary component of the genitourinary syndrome of menopause (GSM)
Source: Springer Nature journal article supplement (doi:10.1186/s12905-021-01523-x), 2021-11-08
Supplement: MOESM1 [file 19845328]

## Appendix A Topic guide

| Topics                                          | Questions                                                                                                                                                                                                                                         | Triggers                                                                                                                  |
|-------------------------------------------------|---------------------------------------------------------------------------------------------------------------------------------------------------------------------------------------------------------------------------------------------------|---------------------------------------------------------------------------------------------------------------------------|
| Personal experiences with urological complaints | Which urological complaints (increased urge to urinate, painful and/or difficult urination and increased urinary tract infections) have you suffered from since the beginning of the menopause and which of these complaints limits you the most? |                                                                                                                           |
| Everyday activities                             | To what extent do your urinary complaints interfere with your everyday activities? Which activities are especially affected?                                                                                                                      | Going for a walk, sitting for a long period of time, cycling, choice of clothes, rituals to relieve/tolerate the symptoms |
| Emotional well-being                            | To what extent do your urinary complaints affect your emotional well-being? How do you feel because of your complaints?                                                                                                                           | Depression, frustration, shame, fear, worries                                                                             |
| Sexual functioning                              | How much do your urinary problems affect your sexual functioning? Are you still interested in sexual activities? Do you still experience satisfaction during any sexual activity? Are you satisfied with your sex life? What do you wish for?     | Feelings of guilt, avoidance strategies, covering up the complaints                                                       |
| Self-concept and body image                     | How do your urinary complaints influence your body image? How do you perceive yourself?                                                                                                                                                           | Feeling 'old', decreasing "femininity", social pressure                                                                   |
| Interpersonal relations and communication       | To what extent do your urinary complaints affect your interpersonal relations (friendships, partnership, family)? Do you talk about your complaints? If yes, with whom? If not, why not?                                                          | Overcoming, fear of being laughed/not being taken seriously, shame, isolation                                             |
| Expectations regarding urinary complaints       | Did you expect to develop such complaints and why? To what extent did you know about these symptoms at the beginning of the menopause? What do you think are the causes of your symptoms?                                                         |                                                                                                                           |
| Health education by the attending physician     | Did you find it difficult to discuss your complaints with a physician? Did you have the feeling that your physician was familiar with your complaints? Did you feel taken seriously?                                                              |                                                                                                                           |
